# Supplementary material for: Mechanism of ribosome rescue by alternative ribosome-rescue factor B
Source: PubMed Central journal article supplement (PMC7427801; doi:10.1038/s41467-020-17853-7), 2020-08-14
Supplement: 41467_2020_17853_MOESM1_ESM.pdf [file 41467_2020_17853_MOESM1_ESM.pdf]

# Mechanism of Ribosome Rescue by Alternative Ribosome-Rescue

## Factor B - **Supplementary Information**

Kai-Hsin Chan<sup>1</sup>, Valentyn Petrychenko<sup>2</sup>, Claudia Mueller<sup>3</sup>, Cristina Maracci<sup>1</sup>, Wolf Holtkamp<sup>1,4</sup>, Daniel N. Wilson<sup>3</sup>, Niels Fischer<sup>2\*</sup> and Marina V. Rodnina<sup>1\*</sup>

<sup>1</sup> Department of Physical Biochemistry, Max Planck Institute for Biophysical Chemistry, Am Fassberg 11, 37077 Göttingen, Germany

<sup>2</sup> Department of Structural Dynamics, Max Planck Institute for Biophysical Chemistry, Am Fassberg 11, 37077 Göttingen, Germany

<sup>3</sup> Institute for Biochemistry and Molecular Biology, University of Hamburg, Martin-Luther-King-Platz 6, 20146 Hamburg, Germany

<sup>4</sup> Present address: Paul-Ehrlich-Institut, Paul-Ehrlich-Straße 51-59, 63225 Langen

\* Correspondence to: niels.fischer@mpibpc.mpg.de (ORCID 0000-0002-4609-4052) and rodnina@mpibpc.mpg.de (ORCID 0000-0003-0105-3879)

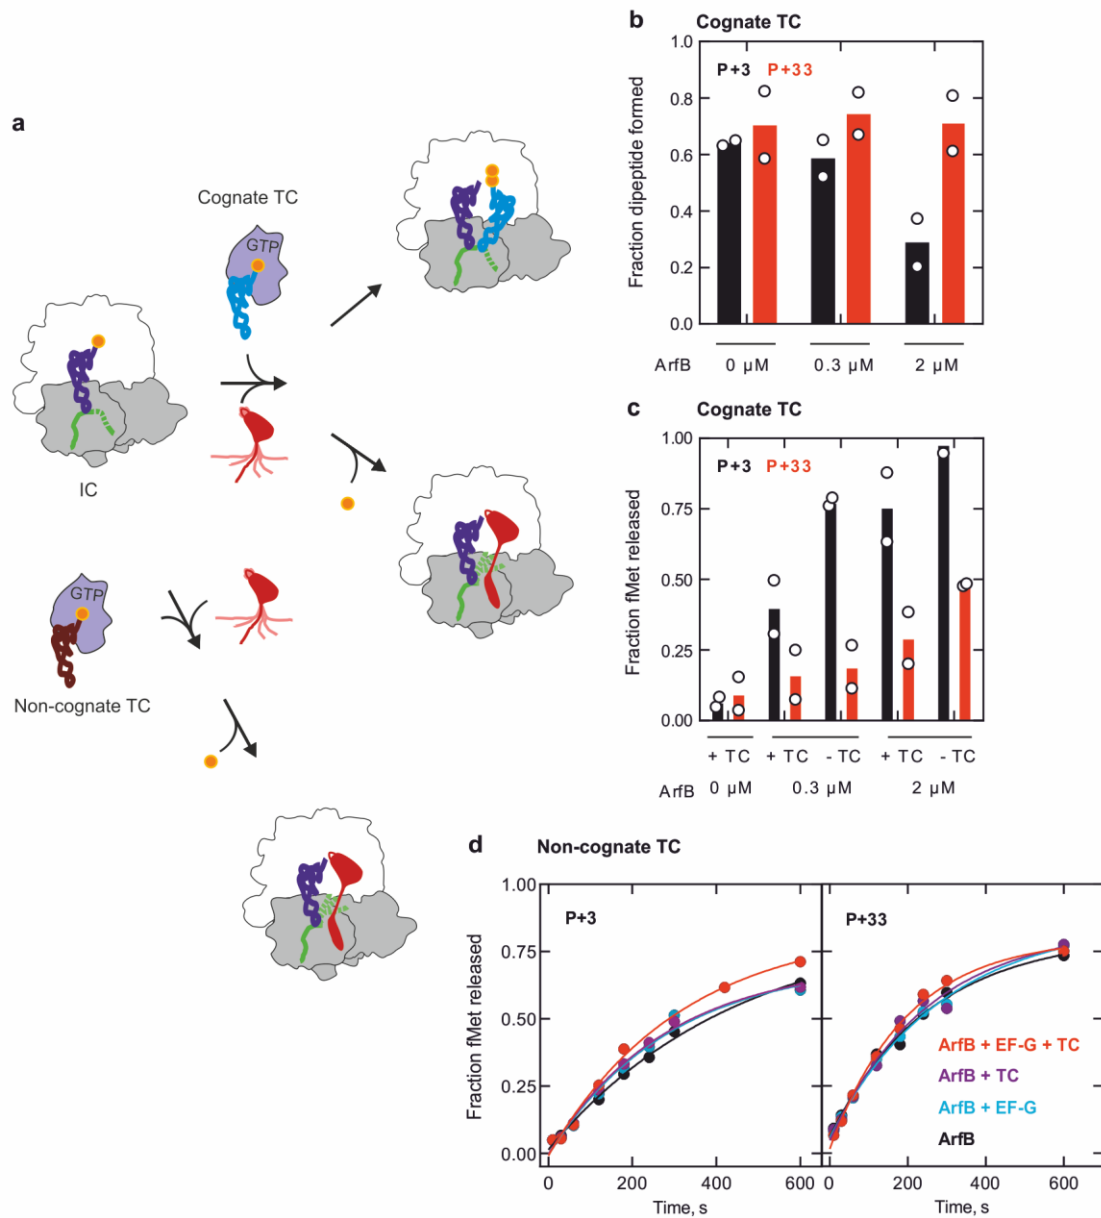

**Supplementary Figure 1 | Cognate ternary complexes (TC), but not non-cognate TC, compete with ArfB for binding to the ribosome.** **a**, Experimental assay to measure competition between ternary complexes and ArfB on ribosome complexes with P+3 or P+33 mRNAs and  $[^3\text{H}]\text{fMet-tRNA}$  in the P site (IC). TC activity is monitored by dipeptide formation ( $\text{f}[^3\text{H}]\text{Met}-[^{14}\text{C}]\text{Phe}$ ), ArfB activity by  $\text{f}[^3\text{H}]\text{Met}$  release from  $\text{f}[^3\text{H}]\text{Met-tRNA}^{\text{fMet}}$ . **b, c**, Dipeptide formation (**b**) and ArfB-induced fMet release (**c**) on P+3 and P+33 initiation complex (IC, 0.5  $\mu\text{M}$ ) mixed with cognate EF-Tu-GTP- $[^{14}\text{C}]\text{Phe-tRNA}^{\text{Phe}}$  (0.25  $\mu\text{M}$ ), and ArfB (0.3 or 2  $\mu\text{M}$ ). Data are presented as mean values from two biological replicates (white circles). **d**, ArfB-induced fMet-tRNA hydrolysis on P+3 and P+33 IC (0.5  $\mu\text{M}$ ) in the presence of ArfB (0.1  $\mu\text{M}$  and 2  $\mu\text{M}$ , respectively), non-cognate EF-Tu-GTP-Val-tRNA $^{\text{Val}}$  (5  $\mu\text{M}$ ) and EF-G (2  $\mu\text{M}$ ).

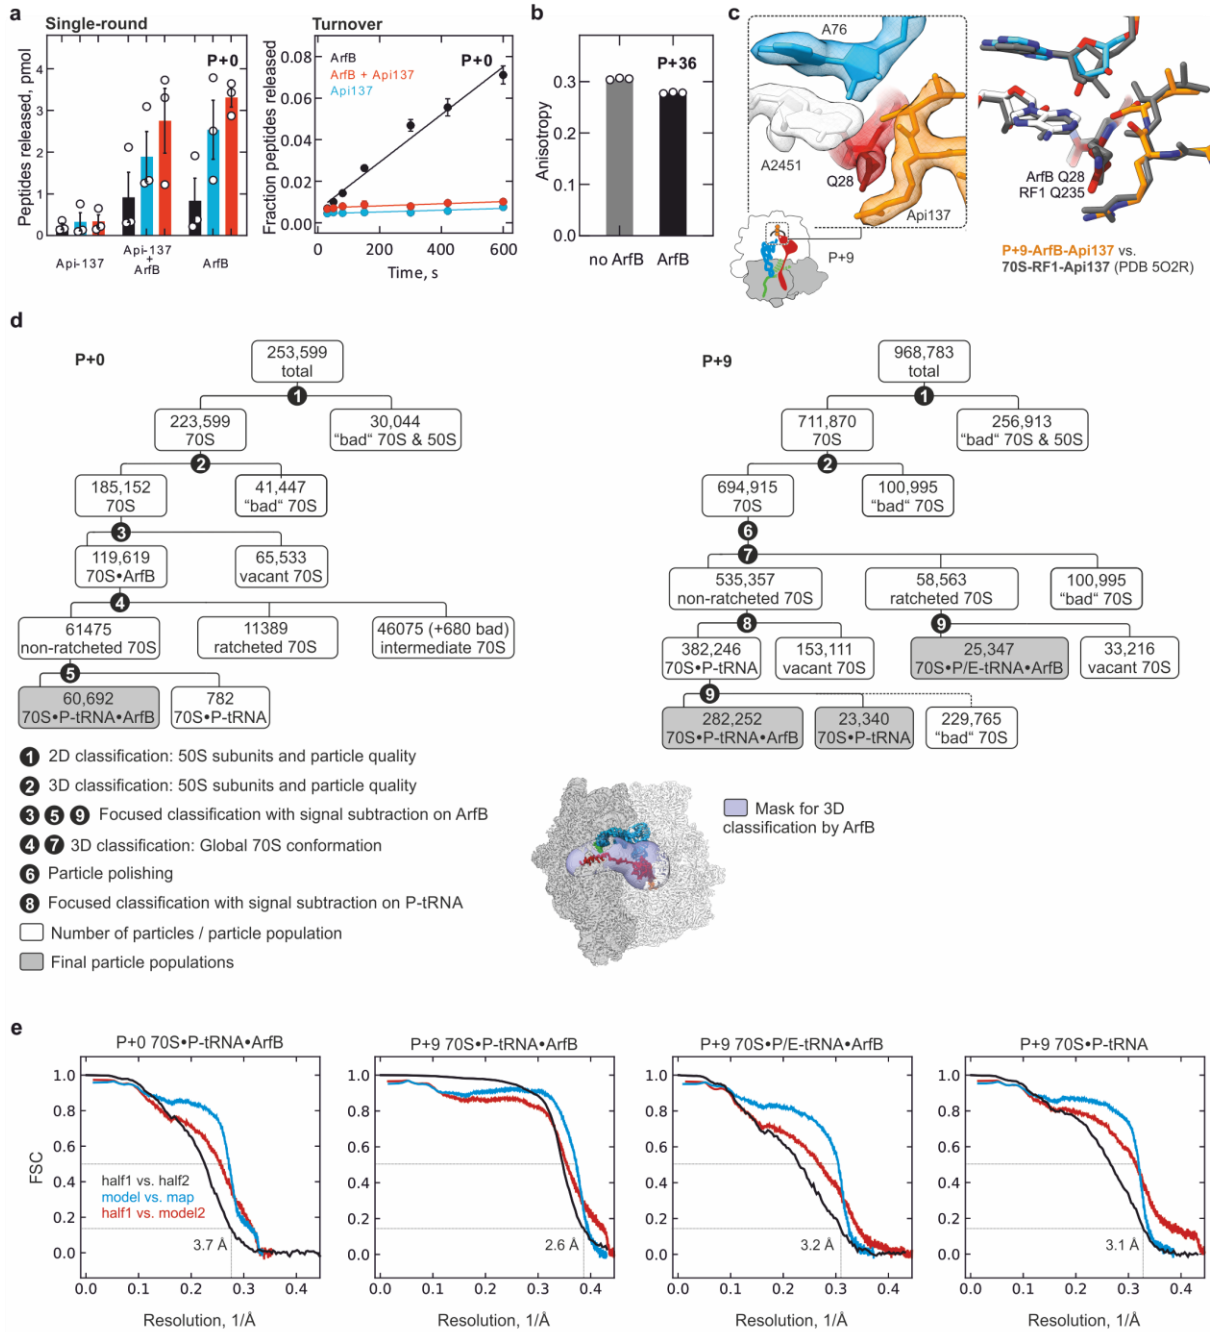

**Supplementary Figure 2 | Cryo-EM analysis of Api137-stalled ribosome–ArfB complexes.** **a**, Api137 traps ArfB on stalled ribosomes after one round of hydrolysis. Left: Single-round peptidyl-tRNA hydrolysis of P+0 complexes (0.1  $\mu\text{M}$ ) by ArfB (1  $\mu\text{M}$ ) in the presence or absence of Api137 (1  $\mu\text{M}$ ). Right: Multiple-turnover peptidyl-tRNA hydrolysis on P+0 complexes (0.2  $\mu\text{M}$ ) by ArfB (0.02  $\mu\text{M}$ ) in the presence or absence of Api137 (1  $\mu\text{M}$ ). Error bars represent the SEM of three biological replicates. **b**, mRNA remains intact after incubation with ArfB. Fluorescence anisotropy of fluorescein attached at the 3' end of ribosome-bound P+36 mRNA is shown before and after addition of ArfB (0.1  $\mu\text{M}$ ) to P+36 ribosome complex (0.01  $\mu\text{M}$ ). Error bars represent the SEM of three biological replicates (white circles). **c**, Api137 stalls ArfB and canonical release factors on the ribosome by a similar structural

mechanism. Left: Cryo-EM density of the PTC in the major P+9 post-hydrolysis state, rendered at  $3.5\sigma$ . Right: Corresponding interaction network of Api37 and the ribosome with ArfB vs. the network reported for RF1<sup>1</sup>. **d**, Sorting of P+0 complexes (left) and P+9 complexes (right) and the mask used for 3D classification for ArfB occupancy (lower right, transparent blue). See Methods for further details. **e**, Fourier-shell-correlation (FSC) curves of P+0 complexes (left) and P+9 complexes.

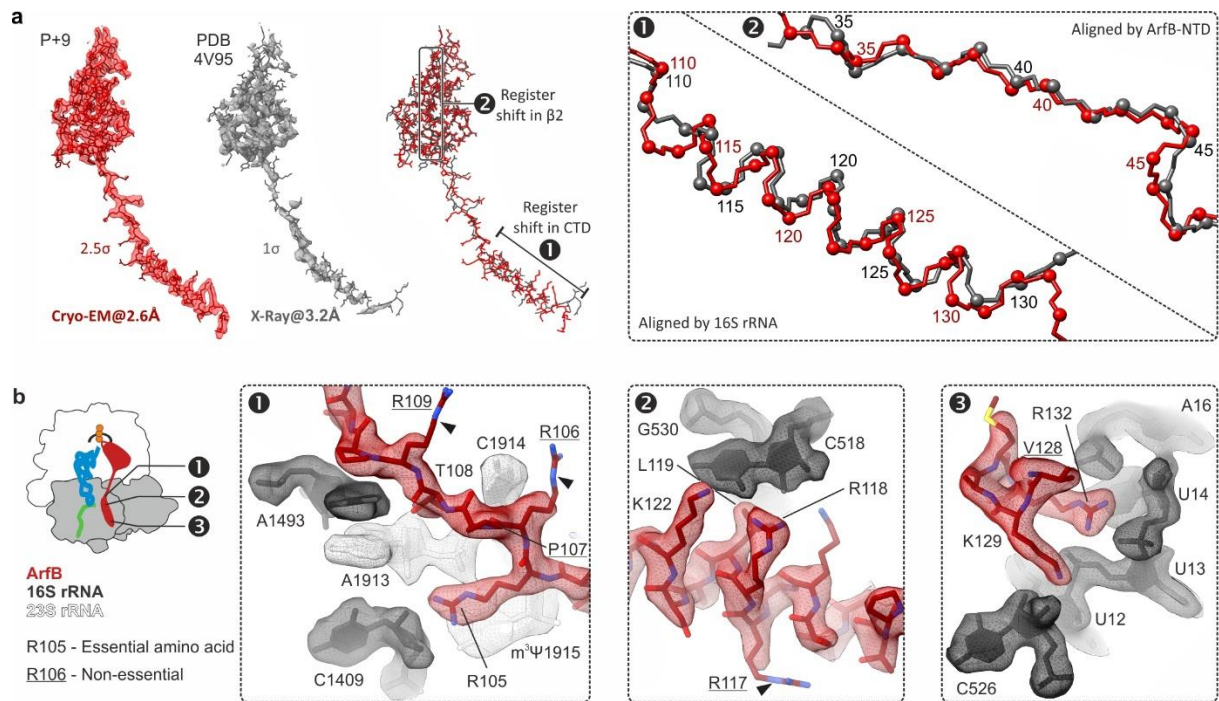

**Supplementary Figure 3 | Quality of the ArfB models.** **a**, Improved atomic model of the ribosome-ArfB complex from the present high-resolution 2.6 Å cryo-EM map. Left: Present cryo-EM density and model of ArfB in the P+9 post-hydrolysis complex, density rendered at 3.5 $\sigma$ . Middle: X-ray based density (2mF<sub>o</sub>-DF<sub>c</sub>) and corresponding model of ArfB in the 3.2 Å crystal structure of a post-hydrolysis complex<sup>2</sup>, density rendered at 1 $\sigma$ . Right: Superposition of the cryo-EM and X-ray based models reveals register shift between the models. Box: Close-ups of register shifts between the models for backbone regions as indicated by labels 1, 2 in the superposition; C $\alpha$  atoms are rendered as spheres with residue numbers. The register shift in the CTD starting at Arg112 affects all subsequent residues and their interactions with the ribosome. **b**, Cryo-EM densities for functionally important ArfB residues. Note the well-defined density for ArfB residues forming important interactions vs. the undefined densities (arrow-heads) for non-essential residues (underlined), which are not involved in tight interactions, in accordance with the functional data<sup>3</sup>. Panels 1, 2, 3 depict distinct regions in ArfB indicated in the schematic (left).

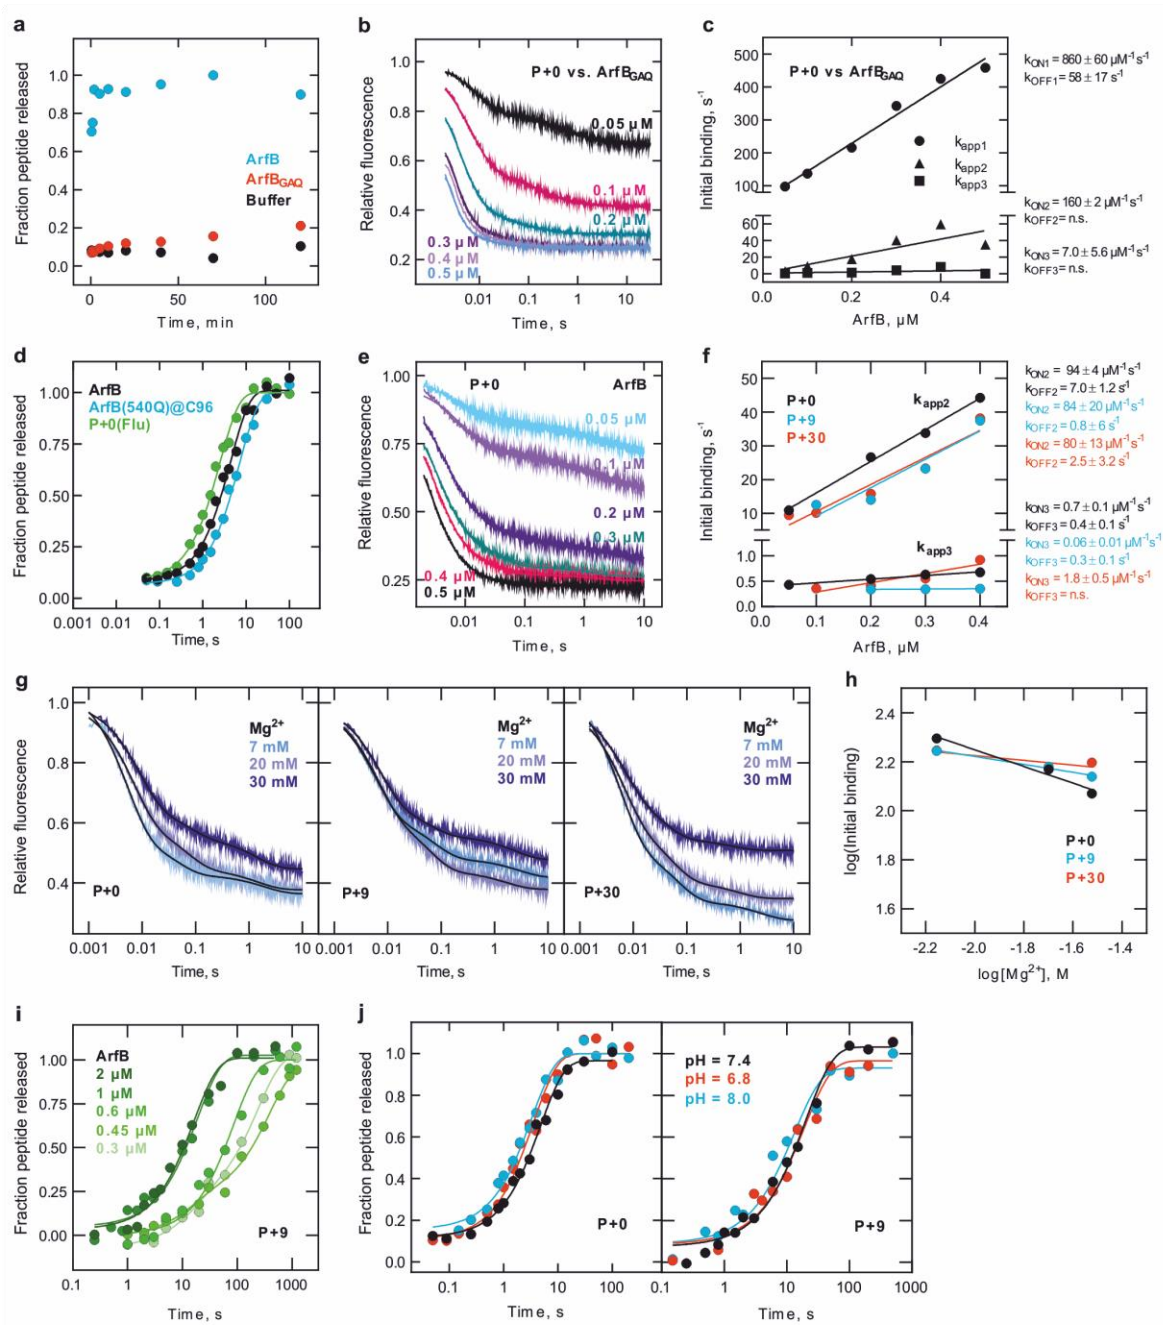

**Supplementary Figure 4 | Detailed characterization of ArfB initial binding and engagement steps. a,** ArfB<sub>GAQ</sub> is catalytically inactive at 20°C. ArfB, ArfB<sub>GAQ</sub> (1 μM) or buffer were mixed with P+0 complex (0.1 μM) and time courses of peptidyl-tRNA hydrolysis were measured. **b,** Time courses of initial binding are similar for ArfB<sub>GAQ</sub> and the catalytically active wild-type ArfB (compare to **e**). ArfB<sub>GAQ</sub>(540Q) (0.05-0.5 μM) was rapidly mixed with P+0(Flu) complexes (0.015 μM). **c,** Linear concentration dependence of the apparent rate constants for the binding of ArfB<sub>GAQ</sub> to P+0. Data are represented as mean values of two independent experiments with six technical replicates each. **d,** Labeled components used in binding experiments have the same activity in the peptidyl-tRNA hydrolysis

reaction as unlabeled wild-type ArfB. Time courses of peptidyl-tRNA hydrolysis with the wt ArfB or ArfB(540Q) labeled at position 96 (1  $\mu\text{M}$ ) on P+0 (0.15  $\mu\text{M}$ ), and of wt ArfB on P+0(Flu) complexes (37°C). Solid lines represent single-exponential fits. **e**, Time courses of ArfB binding to P+0. P+0(Flu) (0.015  $\mu\text{M}$ ) was rapidly mixed with ArfB(540Q) (0.05-0.5  $\mu\text{M}$ ). Solid lines indicate exponential fits with three exponential terms. **f**, Linear concentration dependence of the apparent rate constants for the intermediate and slow phases of ArfB binding to P+0, P+9, and P+30 complexes. **g**, Rapid initial binding of ArfB to the ribosome at increasing  $\text{Mg}^{2+}$  concentrations. ArfB(540Q) (0.2  $\mu\text{M}$ ) was rapidly mixed with P+0(Flu), P+9(Flu), or P+30(Flu) (0.015  $\mu\text{M}$ ) at 7 mM, 20 mM, or 30 mM  $\text{MgCl}_2$ . **h**, Effect of  $\text{Mg}^{2+}$  on the apparent rate constant of the rapid association phase. Data represented as mean values of two independent experiments with six technical replicates each. **i**, Kinetics of peptidyl-tRNA hydrolysis on P+9 complexes. Time courses of hydrolysis with P+9 ribosome complex (0.15  $\mu\text{M}$ ) and ArfB (0.3-2  $\mu\text{M}$ ) (37°C). Data are represented as mean values of two independent experiments. **j**, ArfB-mediated peptidyl-tRNA hydrolysis is pH-independent. Time courses were measured at pH = 7.4, 6.8, or 8.0 with P+0 (left panel) and P+9 (right panel) complexes. ArfB (1  $\mu\text{M}$ ) was rapidly mixed with stalled ribosomes (0.15  $\mu\text{M}$ ) at 37°C.

## Supplementary Table 1. Cryo-EM structure determination.

| Ribosomal complex                               | P+0<br>70S•tRNA•ArfB•Api137                                 | P+9<br>70S•tRNA•ArfB•Api137                                 | P+9 70S•Phe-fMet-tRNA       | P+9<br>70S•tRNA•ArfB•Api137                                 |
|-------------------------------------------------|-------------------------------------------------------------|-------------------------------------------------------------|-----------------------------|-------------------------------------------------------------|
| Ribosomal state                                 | P+0 post-hydrolysis                                         | P+9 post-hydrolysis                                         | P+9 stalled complex         | P+9 tRNA hybrid state                                       |
| <b>Database entries</b>                         |                                                             |                                                             |                             |                                                             |
| EMDB ID                                         | 10908                                                       | 10906                                                       | 10905                       | 10907                                                       |
| PDB ID                                          | 6YSU                                                        | 6YSS                                                        | 6YSR                        | 6YST                                                        |
| <b>Data collection</b>                          |                                                             |                                                             |                             |                                                             |
| Microscope                                      | Titan Krios                                                 | Titan Krios                                                 | Titan Krios                 | Titan Krios                                                 |
| Camera                                          | Falcon II                                                   | Falcon III                                                  | Falcon III                  | Falcon III                                                  |
| Magnification                                   | 59.000                                                      | 59.000                                                      | 59.000                      | 59.000                                                      |
| Voltage (kV)                                    | 300                                                         | 300                                                         | 300                         | 300                                                         |
| Electron dose (e <sup>-</sup> /Å <sup>2</sup> ) | 25                                                          | 50                                                          | 50                          | 50                                                          |
| Defocus range (μm)                              | 1.2-2.3                                                     | 0.2-2.5                                                     | 0.2-2.5                     | 0.2-2.5                                                     |
| Pixel size (Å)                                  | 1.072                                                       | 1.16                                                        | 1.16                        | 1.16                                                        |
| <b>Cryo-EM reconstruction</b>                   |                                                             |                                                             |                             |                                                             |
| Final resolution                                | 3.7                                                         | 2.6                                                         | 3.1                         | 3.2                                                         |
| Final particles (no.)                           | 60.692                                                      | 282.252                                                     | 25.347                      | 23.340                                                      |
| Point group symmetry                            | C1                                                          | C1                                                          | C1                          | C1                                                          |
| FSC-threshold                                   | 0.143                                                       | 0.143                                                       | 0.143                       | 0.143                                                       |
| Resolution (Å)                                  | 3.7                                                         | 2.6                                                         | 3.1                         | 3.2                                                         |
| Resolution metric                               | gold standard FSC                                           | gold standard FSC                                           | gold standard FSC           | gold standard FSC                                           |
| <b>Atomic model refinement</b>                  |                                                             |                                                             |                             |                                                             |
| Final resolution (Å)                            | 3.7                                                         | 2.6                                                         | 3.1                         | 3.2                                                         |
| Cumulative RSCC (%) >0.8/>0.6/>0.4              | 84.80%/96.49%/98.79%                                        | 87.47%/95.28%/97.23%                                        | 80.50%/94.66%/97.31%        | 67.52%/93.74%/97.93%                                        |
| Initial models used                             | 5afi (70S)<br>4v95 (ArfB)<br>5O2R (Api137)<br>4RB7 (P-tRNA) | 5afi (70S)<br>4v95 (ArfB)<br>5O2R (Api137)<br>4RB7 (P-tRNA) | 5afi (70S)<br>4RB7 (P-tRNA) | 5afi (70S)<br>4v95 (ArfB)<br>5O2R (Api137)<br>4RB7 (P-tRNA) |
| Molprobrity score                               | 2.41                                                        | 2.05                                                        | 2.15                        | 2.45                                                        |
| Clashscore                                      | 20.23                                                       | 10.58                                                       | 12.11                       | 20.46                                                       |
| <b>No. Atoms/No. Residues/RSCC</b>              |                                                             |                                                             |                             |                                                             |
| Total                                           | 146404/10675/0.85                                           | 147051/10751/0.86                                           | 145963/10607/0.83           | 146850/10748/0.81                                           |
| Protein                                         | 46328/6030/0.84                                             | 46921/6105/0.86                                             | 45722/5954/0.82             | 46921/6105/0.78                                             |
| Nucleic                                         | 99717/4645/0.87                                             | 99739/4646/0.87                                             | 99903/4653/0.85             | 99672/4643/0.83                                             |
| ArfB                                            | 1078/140/0.75                                               | 1078/140/0.88                                               | -                           | 1078/140/0.84                                               |
| <b>B-factors</b>                                |                                                             |                                                             |                             |                                                             |
| Protein                                         | 77.38                                                       | 36.20                                                       | 63.65                       | 96.08                                                       |
| Nucleotide                                      | 81.47                                                       | 36.82                                                       | 64.24                       | 93.91                                                       |
| Ligands, Ions                                   | 54.69                                                       | 23.40                                                       | 43.02                       | 60.77                                                       |
| <b>R.m.s. deviations</b>                        |                                                             |                                                             |                             |                                                             |
| Bond lengths (Å)                                | 0.007                                                       | 0.007                                                       | 0.006                       | 0.007                                                       |
| Bond angles (°)                                 | 0.758                                                       | 0.685                                                       | 0.737                       | 0.847                                                       |
| <b>Ramachandran plot</b>                        |                                                             |                                                             |                             |                                                             |
| Favored (%)                                     | 87.72                                                       | 91.50                                                       | 89.74                       | 86.10                                                       |
| Allowed (%)                                     | 12.10                                                       | 8.08                                                        | 9.88                        | 13.49                                                       |
| Disallowed (%)                                  | 0.19                                                        | 0.42                                                        | 0.38                        | 0.42                                                        |

\*For model refinement, maps at ≤3.1Å resolution were resampled to 512×512×512 pixels, corresponding to a pixel size of 0.6525Å



**Supplementary Table 2. Summary of rate constants.**

|                                      | <b>P+0</b>        | <b>P+9</b>      | <b>P+30</b>       |
|--------------------------------------|-------------------|-----------------|-------------------|
| Hydrolysis rate, $s^{-1}$            | $0.15 \pm 0.01$   | $0.06 \pm 0.01$ | $0.004 \pm 0.001$ |
| Fast $k_{ON}$ , $\mu M^{-1}s^{-1}$   | $470 \pm 70$      | $280 \pm 30$    | $320 \pm 40$      |
| Fast $k_{OFF}$ , $s^{-1}$            | $110 \pm 20$      | $140 \pm 10$    | $120 \pm 10$      |
| Medium $k_{ON}$ , $\mu M^{-1}s^{-1}$ | $94 \pm 4$        | $84 \pm 20$     | $80 \pm 13$       |
| Medium $k_{OFF}$ , $s^{-1}$          | $7.0 \pm 1.2$     | $0.8 \pm 6$     | $2.5 \pm 3.2$     |
| Slow $k_{ON}$ , $\mu M^{-1}s^{-1}$   | $0.7 \pm 0.1$     | $0.06 \pm 0.01$ | $1.8 \pm 0.5$     |
| Slow $k_{OFF}$ , $s^{-1}$            | $0.4 \pm 0.1$     | $0.3 \pm 0.1$   | n.s.              |
| $k_{diss\ avg}$ , $s^{-1}$           | $0.06 \pm 0.01$   | $0.23 \pm 0.01$ | $0.33 \pm 0.01$   |
| $K_M$ , $\mu M$                      | $0.25 \pm 0.09$   | n.s.            |                   |
| $k_{cat}$ , $s^{-1}$                 | $0.010 \pm 0.001$ | n.s.            |                   |

The hydrolysis rate is obtained by exponential fitting of single-round hydrolysis time courses (Fig. 4d,e). The  $k_{ON}$  and  $k_{OFF}$  values were calculated from the slope and Y-axis intercept, respectively, of the linear concentration dependence of the apparent rate constant of the rapid initial binding phase (Fig. 4c).  $k_{diss\_avg}$  is a weighted average dissociation rate constant of the ArfB-ribosome complex estimated from the time courses of Fig. 4f.  $K_M$  is the substrate concentration at which the reaction velocity reaches half-maximum and is calculated by hyperbolic fitting of the Michaelis-Menten titration (Fig. 5A).  $k_{cat}$  is calculated by dividing the maximum reaction velocity with the ArfB concentration in the reaction.

**Supplementary Table 3. Apparent rate constants of ArfB dissociation.**

|             | $k_{app}^1, s^{-1}$ | $A_1$           | $k_{app}^2, s^{-1}$ | $A_2$           |
|-------------|---------------------|-----------------|---------------------|-----------------|
| <b>P+0</b>  | $0.41 \pm 0.01$     | $0.21 \pm 0.02$ | $0.04 \pm 0.01$     | $0.79 \pm 0.02$ |
| <b>P+9</b>  | $0.41 \pm 0.01$     | $0.47 \pm 0.01$ | $0.07 \pm 0.01$     | $0.53 \pm 0.01$ |
| <b>P+30</b> | $0.47 \pm 0.01$     | $0.61 \pm 0.01$ | $0.10 \pm 0.01$     | $0.39 \pm 0.01$ |

Apparent rate constants were obtained from the exponential fit of representative dissociation experiments with at least 6 technical replicates averaged. Values are averages with SEM of the fit.

### Supplementary References

1. Florin, T. et al. An antimicrobial peptide that inhibits translation by trapping release factors on the ribosome. *Nat Struct Mol Biol* **24**, 752-757 (2017).
2. Gagnon, M.G., Seetharaman, S.V., Bulkley, D. & Steitz, T.A. Structural basis for the rescue of stalled ribosomes: structure of YaeJ bound to the ribosome. *Science* **335**, 1370-2 (2012).
3. Kogure, H. et al. Identification of residues required for stalled-ribosome rescue in the codon-independent release factor YaeJ. *Nucleic Acids Res* **42**, 3152-63 (2014).
